# Supplementary material
Source: PubMed Central journal article supplement (PMC4104699)
Supplement: NIHMS591199-supplement-supplement_1.pdf [file NIHMS591199-supplement-supplement_1.pdf]

**Supplementary Information****Dose Ranging, Expanded Acute Toxicity and Safety Pharmacology studies for Intravenously Administered Functionalized Graphene Nanoparticle Formulations**

Shruti Kanakia<sup>1</sup>, Jimmy Toussaint<sup>1</sup>, Sayan Mullick Chowdhury<sup>1</sup>, Tanuf Tembulkar<sup>1</sup>, Stephen Lee<sup>1</sup>, Ya-Ping Jiang<sup>2</sup>, Richard Z. Lin<sup>2</sup>, Kenneth R. Shroyer<sup>3</sup>, William Moore<sup>4</sup>, Balaji Sitharaman<sup>1\*</sup>

<sup>1</sup>Department of Biomedical Engineering, <sup>2</sup>Department of Physiology & Biophysics, <sup>3</sup>Department of Pathology, <sup>4</sup>Department of Radiology, Stony Brook University, Stony Brook, NY, USA

\*Address Correspondence to:

Balaji Sitharaman, Ph.D., Department of Biomedical Engineering, Bioengineering Building, Rm #115, Stony Brook University, Stony Brook, NY 11794-5281, USA; Ph: 631-632-1810, Email: [balaji.sithararaman@stonybrook.edu](mailto:balaji.sithararaman@stonybrook.edu)

## Characterization

**Table S1.** Physicochemical characterization and *in vitro* study results of GNP-Dex formulation.[1-3]

**Abbreviations:** TEM, transmission electron microscopy; AFM, atomic force microscopy; EELS, electron energy loss spectroscopy; RS, Raman spectroscopy; ICP-MS, inductively coupled plasma mass spectrometry; EPR, electron paramagnetic resonance; SEM, scanning electron microscopy; TGA, thermal gravimetric analysis.

| Study/ Reference                       | Test Article/Dose                | Duration                                | Evaluation Method                                 | Noteworthy Findings                                                                                                                             |
|----------------------------------------|----------------------------------|-----------------------------------------|---------------------------------------------------|-------------------------------------------------------------------------------------------------------------------------------------------------|
| Particle size                          | GNP-Dex                          |                                         | TEM, AFM                                          | Size ~100 nm, Thickness 3-4 nm                                                                                                                  |
| Size distribution                      | GNP-Dex                          |                                         | TEM                                               | 100±20 nm                                                                                                                                       |
| Dispersibility                         | GNP-Dex                          | 0.4, 10, 2, 50, 100, 200 mg/mL          | Visual assessment                                 | Stable colloidal dispersion up to 100 mg/ml.                                                                                                    |
| Structure/shape,                       | GNP-Dex                          |                                         | TEM, AFM                                          | Disc shaped particles                                                                                                                           |
| Chemical composition                   | GNP-Dex                          |                                         | EELS, RS, ICP-MS,EPR                              |                                                                                                                                                 |
| Topology                               | GNP-Dex                          |                                         | TEM,SEM, AFM                                      | Dextran coils around the graphene nanoparticles                                                                                                 |
| Quantitative composition               | GNP-Dex                          |                                         | ICP-MS<br>TGA                                     | GNP-60% by weight.<br>Dextran-40% by weight.<br>Manganese – 0.064 % by weight.                                                                  |
| Surface coating and composition        | GNP-Dex                          |                                         | TGA                                               | Dextran 10K; 40% by weight                                                                                                                      |
| Stability - chemical-thermal stability | GNP-Dex<br>20, 50, and 100 mg/mL | 3 and 24 hours, 30 days @ 25°C and 37°C | NaBiO <sub>3</sub> test- UV-Vis spectrophotometer | No color change observed in sodium bismuthate (NaBiO <sub>3</sub> ) test. Negligible < Limit Of Detection (0.01µM) of UV-Vis spectrophotometer. |
| Dispersion stability                   | GNP-Dex<br>0.4, 10, 20,          | 0, 1, 2, 4, 24 hours                    | Visual assessment and digital                     | No apparent precipitation                                                                                                                       |

|                                       |                                                                      |                               |                                                                                      |                                                                                                                                                   |
|---------------------------------------|----------------------------------------------------------------------|-------------------------------|--------------------------------------------------------------------------------------|---------------------------------------------------------------------------------------------------------------------------------------------------|
|                                       | 50, and 100 mg/mL in Distilled Deionized water + mannitol (55 mg/ml) | after formulation preparation | photograph of the solution                                                           | through 4 hours - all concentrations. Apparent precipitation at 100 mg/kg at 24 hour, but easily redispersed.                                     |
| Osmolality                            | 0.4-100 mg/mL in DDI water                                           | <i>In vitro</i>               | Osmometer                                                                            | Hypo-osmolar in DDI water (2-186 mOsm). With addition of Mannitol in GNP-Dex solution roughly iso-osmolar range to blood (190-320 mOsm/kg).       |
| Viscosity                             | 0.4-100 mg/mL                                                        | <i>In Vitro</i>               | Viscometer                                                                           | 1.01-3.81 cP @ 37°C, 50 rpm and 0.86-2.09 cP @ 37°C, 100 rpm; values similar to blood viscosity (3-4 cp) and generally other approved MRI agents. |
| Hydrophilicity/partition co-efficient | 20 mg/mL                                                             | <i>In Vitro</i>               | Flask shaking method and analysis of nanoparticle concentration by spectrophotometry | Very hydrophilic with low partition coefficient; log $K_{ow}$ = -0.18.                                                                            |

**Table S2.** *In vitro* and *in vivo* studies of GNP-Dex formulation.[2, 3]

**Abbreviations:** ELISA, enzyme-linked immunosorbent assay; OPT, o-phthalaldehyde; Rxn, reaction; PEI, Polyethylene imine; RBC, red blood cells; ACh, acetylcholine; ADO, adenosine; PE, phenylephrine; PF4, platelet factor 4; Sc5b9, Soluble terminal Complement Complex; Bb, factor B.

| Study/Reference     | Species/Test System           | Test Article/Dose              | Duration             | Route           | Evaluation                                        | Noteworthy Findings                                                                     |
|---------------------|-------------------------------|--------------------------------|----------------------|-----------------|---------------------------------------------------|-----------------------------------------------------------------------------------------|
| Protein Binding     | Human albumin                 | 0.1, 1 and 10 mg/mL            | 37°C for 24 hours    | <i>In vitro</i> | Equilibrium dialysis and UV-Vis spectrophotometer | GNP-Dex did not show significant binding to protein.                                    |
| Histamine Release   | Whole blood, human            | 0.1, 1, and 10 mg/mL – GNP-Dex | 60 min at 37°C       | <i>In vitro</i> | Histamine levels (test kit) – ELISA               | Negligible ↑ in level of histamine release up to 0.1 mg/mL when compared with controls. |
|                     | Mast cells, rat               | 0, 1, 7, and 10 mg/mL GNP-Dex  | 5 min pre-treatment  |                 | Histamine-OPT Rxn – Fluorescence intensity        | Negligible ↑ in level of histamine release up to 10 mg/mL when compared with controls.  |
| Platelet Activation | Whole blood, human – 2 donors | 0, 1, 7, and 10 mg/mL GNP-Dex  | 45 min pre-treatment | <i>In vitro</i> | PF4 release - ELISA                               | Negligible ↑ in level of PF4 up to 10 mg/mL when compared with controls.                |

| Study/<br>Reference      | Species/<br>Test<br>System           | Test<br>Article/Dose                | Duration                    | Route               | Evaluation                                  | Noteworthy<br>Findings                                                                                                                                                                                                                                                                                                                                                                                                                                 |
|--------------------------|--------------------------------------|-------------------------------------|-----------------------------|---------------------|---------------------------------------------|--------------------------------------------------------------------------------------------------------------------------------------------------------------------------------------------------------------------------------------------------------------------------------------------------------------------------------------------------------------------------------------------------------------------------------------------------------|
| Complement<br>Activation | Whole<br>blood,<br>human-2<br>donors | 0, 1, 7, and 10<br>mg/mL<br>GNP-Dex | 45 min<br>pre-<br>treatment | <i>In<br/>vitro</i> | Sc5b9 or Bb<br>levels (test kit)<br>– ELISA | <p>No significant<br/>↑ in Sc5b9 at<br/>1 and 7<br/>mg/mL GNP-<br/>Dex<br/>compared<br/>with controls.</p> <p>Significant ↑<br/>(≈20%<br/>compared<br/>with controls)<br/>at 10 mg/mL.</p> <p>Similar ↑<br/>(≈18%) in Bb<br/>at 4 mg/mL<br/>dextran but<br/>not at 0.4 or<br/>2.8 mg/mL<br/>when<br/>compared<br/>with controls.</p> <p>↑ in<br/>complement<br/>activation at<br/>high<br/>concentration<br/>likely a<br/>function of<br/>dextran.</p> |

| Study/<br>Reference | Species/<br>Test<br>System                             | Test<br>Article/Dose                                                                                        | Duration                    | Route               | Evaluation                                                                                                                                                                                                                  | Noteworthy<br>Findings                                                                                                                                                                                               |
|---------------------|--------------------------------------------------------|-------------------------------------------------------------------------------------------------------------|-----------------------------|---------------------|-----------------------------------------------------------------------------------------------------------------------------------------------------------------------------------------------------------------------------|----------------------------------------------------------------------------------------------------------------------------------------------------------------------------------------------------------------------|
| RBC<br>Aggregation  | Whole<br>blood,<br>human-1<br>donor                    | 0, 1, 7, and 10<br>mg/mL<br>GNP-Dex<br><br>Positive<br>control - PEI                                        | 45 min<br>pre-<br>treatment | <i>In<br/>vitro</i> | Visualization<br>(630X) of blood<br>smears                                                                                                                                                                                  | No<br>aggregation or<br>morphologica<br>l change in<br>RBCs up to<br>10 mg/mL.<br><br>PEI caused<br>aggregation.                                                                                                     |
| Vasoactivity        | Hamster<br>; n =<br>8M/GN<br>P-Dex;<br>3M/dext<br>ran) | Vasoactivity<br><br>GNP-Dex – 0,<br>0.1, 0.5, 2.6,<br>10, and 50<br>mg/mL<br><br>Dextran – 3.5,<br>35 mg/mL |                             | IV                  | Cheek pouch<br>model –<br>vasoactivity;<br>ACh, ADO, PE<br>response<br>modification<br><br>- arcade and<br>terminal<br>arterioles<br>junction - $\Delta$ in<br>vessel diameter<br>in response to<br>vasoactive<br>compounds | Concentration<br>dependent<br>dilation with<br>GNP-Dex;<br>significant $\uparrow \geq$<br>2.4 mg/mL;<br>EC50 = 2.4-<br>2.6 mg/mL<br><br>with<br>maximum<br>dilation<br>ranging from<br>60% (arcade<br>arterioles) to |

| Study/<br>Reference | Species/<br>Test<br>System | Test<br>Article/Dose                                                                                                            | Duration | Route | Evaluation | Noteworthy<br>Findings                                                                                                                                                                                                                                                                               |
|---------------------|----------------------------|---------------------------------------------------------------------------------------------------------------------------------|----------|-------|------------|------------------------------------------------------------------------------------------------------------------------------------------------------------------------------------------------------------------------------------------------------------------------------------------------------|
|                     |                            | <p>Vasoresponse change –</p> <p>GNP-Dex - 50 mg/mL; pre and 15-min post vasoactive agent exposure</p> <p>4-10M ACh, ADO, PE</p> |          |       |            | <p>76% (terminal arterioles); no effect with dextran only.</p> <p>No apparent effect on vasoresponse to ACh, ADO, PE at doses of 50 mg/mL.</p> <p>Conclusion: No endothelial dysfunction associated with exposure to GNP-Dex based on an absence of alteration in response to vasoactive agents.</p> |

**Table S3.** Rationale for choosing the medium and high GNP-Dex doses. The potential clinical therapeutic doses of graphene-based formulations for potential imaging or therapeutic applications still need to be determined. Therefore, published values of other clinical imaging and therapeutic agents; shown in the table below, were used as representative examples. We assumed that GNP-Dex could also be eventually administered, as a therapeutic or imaging agent, at similar doses. Based on this assumption and published regulatory guidelines, we chose medium to high doses 10-100 times the doses of these other clinical approved pharmaceuticals. The upper limit (500 mg/kg) was limited by the maximum permissible dose (MPD) that could be achieved using the highest GNP-Dex stock concentration of 100 mg/ml.

| <b>Clinically approve therapeutic and diagnostic agents</b>    | <b>Recommended clinical dose</b> | <b>Equivalent mg/kg dose</b> |
|----------------------------------------------------------------|----------------------------------|------------------------------|
| Myocet - Liposomal doxorubicin                                 | 60 -75 mg/m <sup>2</sup> [4][4]  | 1.632-2.04 mg/kg*            |
| Abraxane – Albumin bound Paclitaxel nanoparticles              | 100-250 mg/m <sup>2</sup> [5][5] | 2.72 -6.8 mg/kg*             |
| Doxorubicin - chemotherapeutic                                 | 60 mg/m <sup>2</sup> [6][6]      | 1.632 mg/kg*                 |
| Ablavar – Blood pool magnetic resonance imaging contrast agent | 0.03 mmol/kg [7][7]              | 29 mg/kg                     |

\*Note: The conversion to mg/kg doses were performed based on the body weight and body surface area information provided at following webpage.

[http://www.vspn.org/Library/Misc/VSPN\\_M02372.htm](http://www.vspn.org/Library/Misc/VSPN_M02372.htm)



### Extrapolation of % of GNP-Dex

As reported in our previous study [2], the % of manganese calculated in the GNP-Dex samples was average of 6 different samples of GNP-Dex. The ICP MS system used in this study allows detection even at concentrations down to 1 ppb.

For the biodistribution studies, with the tested three doses 50, 250 and 500 mg/kg, a total of 12.5, 62.5 and 125 mg of GNP-Dex injected in a 250 g rat. Considering 0.064 wt% of manganese in the sample, the amount of manganese injected in rats will be 8, 40 and 80  $\mu\text{g}$  for 50, 250 and 500 mg/kg respectively. Thus, 8, 40 and 80  $\mu\text{g}$  of manganese was considered as 100% injected dose in each animal injected with 50, 250 and 500 mg/kg respectively.

Since tissue samples were pooled from 6 animals for chemical digestion, the measured manganese i.e.  $[\text{Mn}^{2+} (\text{experimental group})] = [\text{concentration obtained from ICP}]/6$ .

Similarly, the measured  $\text{Mn}^{2+}$  for tissue sample pooled from 6 sham animals i.e.  $[(\text{Mn}^{2+} (\text{sham control group}))] = [\text{concentration obtained from ICP}]/6$ .

The % injected dose values in various tissues were calculated using the formula

$$[\{[\text{Mn}^{2+} (\text{experimental group})] - [\text{Mn}^{2+} (\text{sham control group})]\} / [\text{Mn}^{2+} (\text{injected doses})]] * 100.$$

**Necropsy**

Necropsies were performed on five rats postmortem. The procedure was performed by Antech Diagnostics (New Hyde Park, NY). The outcomes and diagnosis from all the necropsies were similar. The pdf copy of one necropsy report titled “necropsy” is uploaded as a separate file.

**Figure Legends**

**Figure S1.** Representative TEM image of GNP-Dex **a)** low magnification and **b)** higher magnification.

**Figure S2.** Digital image of GNP-Dex formulations used in toxicity study for animal injections at 100 to 0.4 mg/ml in distilled deionized water.

**Figure S3.** Representative histologic sections of a day 1 animal at 500 mg/kg of GNP-Dex dose at 400x magnification **a)** Cerebellum: without any diagnostic abnormality. **b)** Heart: without diagnostic abnormalities. **c)** Liver: hepatic parenchyma with amorphous debris within sinusoids and central vein (circle). A solitary aggregate of neutrophils was noted (arrow), however, there was no evidence of acute or chronic inflammation. **d)** Lung: pulmonary parenchyma with vascular congestion and intracapillary aggregates of brown pigments (circle). **e)** Kidney: focal aggregates of brown/black pigments in veins (circle) and glomeruli with mild congestion (arrow).

**Figure S4.** Representative tissue histologic sections of a day 30 animal at 500 mg/kg of GNP-Dex dose at 400x magnification **a)** Cerebellum: without any diagnostic abnormality. **b)** Heart: without diagnostic abnormalities. **c)** Liver: with patchy centrilobular congestion (arrow), but no other diagnostic abnormalities. **d)** Lung: focal extravasation of red blood cells into alveolar spaces (arrow). **e)** Kidney: renal medulla congestion (arrows) and aggregates of granular pigments within vascular spaces (circle).

**Figure S5.** Representative tissue histologic sections of a day 30 animal at 250 mg/kg of GNP-Dex dose at 400x magnification a) Cerebral cortex without any diagnostic abnormality. b) Myocardium without diagnostic abnormalities. c) Liver: hepatic parenchyma with amorphous debris in central vein suggestive of presence of GNP-Dex (arrow), no evidence of inflammation. d) Lung: pulmonary parenchyma without any diagnostic abnormalities. e) Kidney: renal cortex with vascular congestion (arrows).

**Figure S6.** Hematological parameters obtained from blood pressure monitor and echocardiography 10 min and 2 hours post injection of GNP-Dex. **a)** Left ventricular volume, diastolic. **b)** Left ventricular volume, systolic. **c)** Atrioventricular peak velocity. **d)** % fractional shortening. **e)** Intravascular septum thickness, diastolic. **f)** Intravascular septum thickness, systolic. **g)** Left ventricular internal dimension, diastolic. **h)** Left ventricular internal dimension, systolic. **i)** Left ventricular posterior wall thickness, diastolic. **j)** Left ventricular posterior wall thickness, systolic.

**Figure S7.** Blood chemistry results for rats injected with GNP-Dex, dextran and mannitol 1 day after injection (n=3). **a)** Blood lipid levels of triglycerides (TG), cholesterol (CHO) and blood glucose (GLU) **b)** Blood ion concentrations of Na, K, Cl and CO<sub>2</sub> **c)** Blood protein levels of total protein (TP) and albumin. All parameters were within the normal range.

**Figures****Figure S1**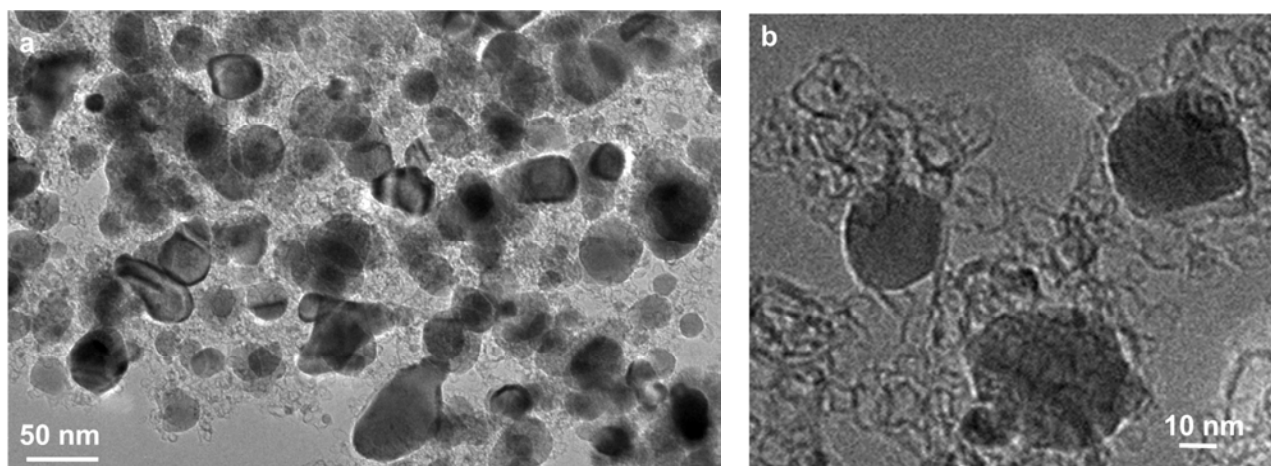

ACCEPTED MANUSCRIPT

Figure S2

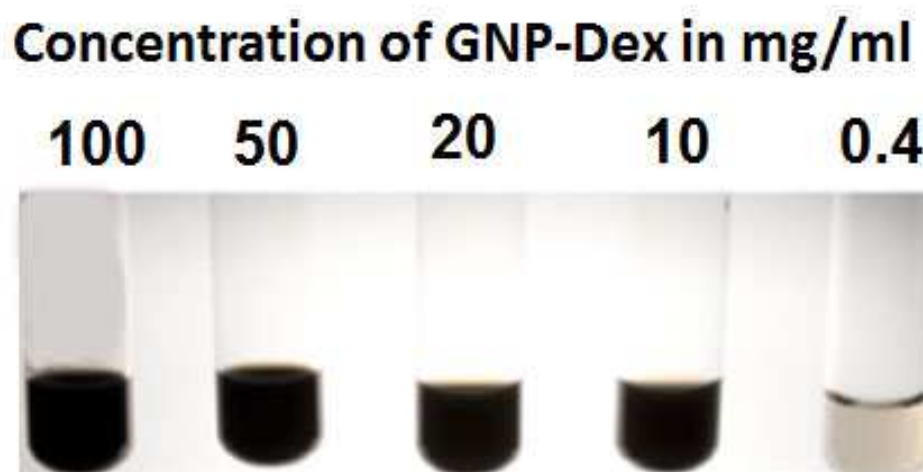

**Histopathology****Figure S3**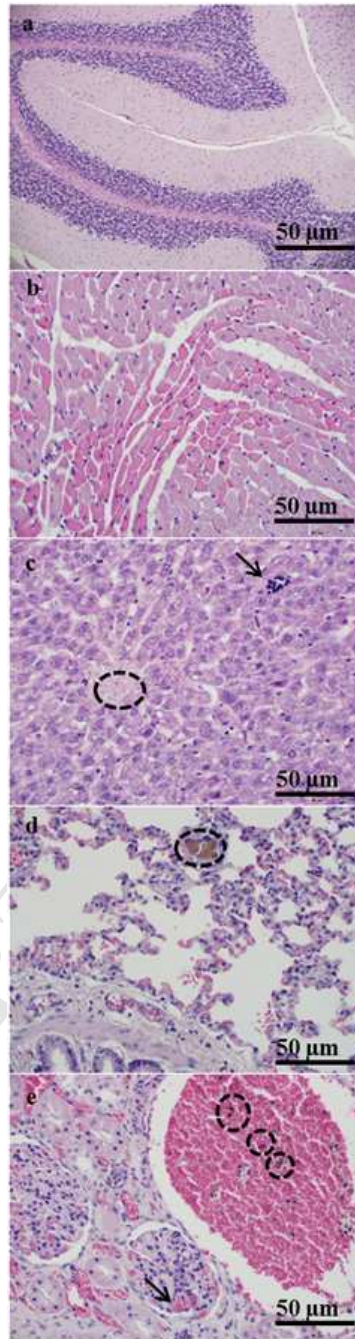

Figure S4

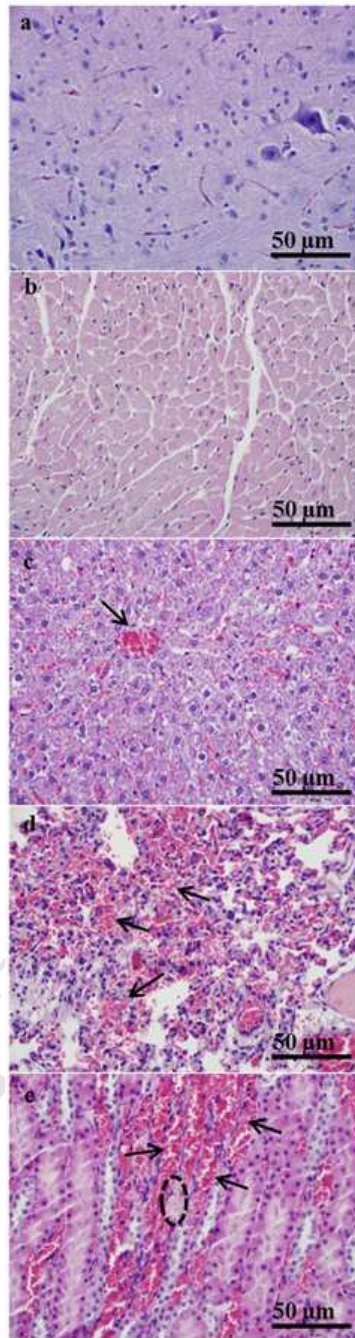



Figure S5

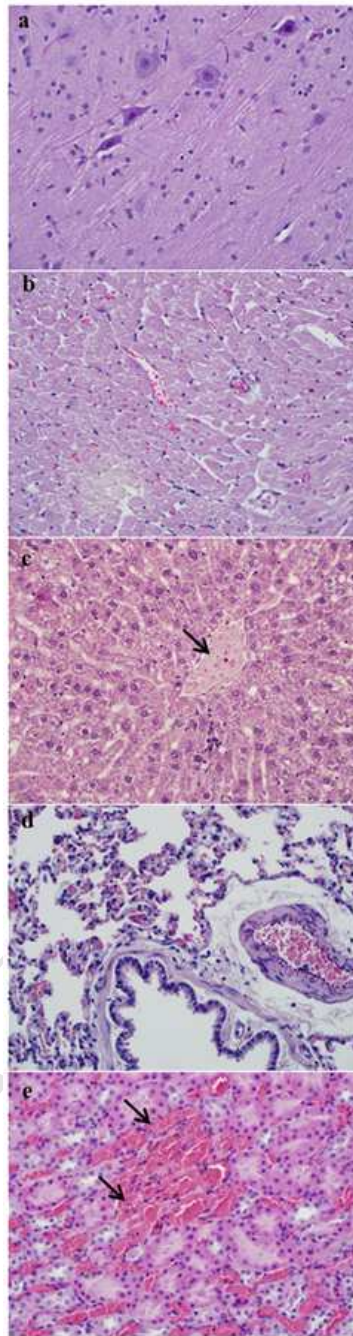

## Hematological parameters

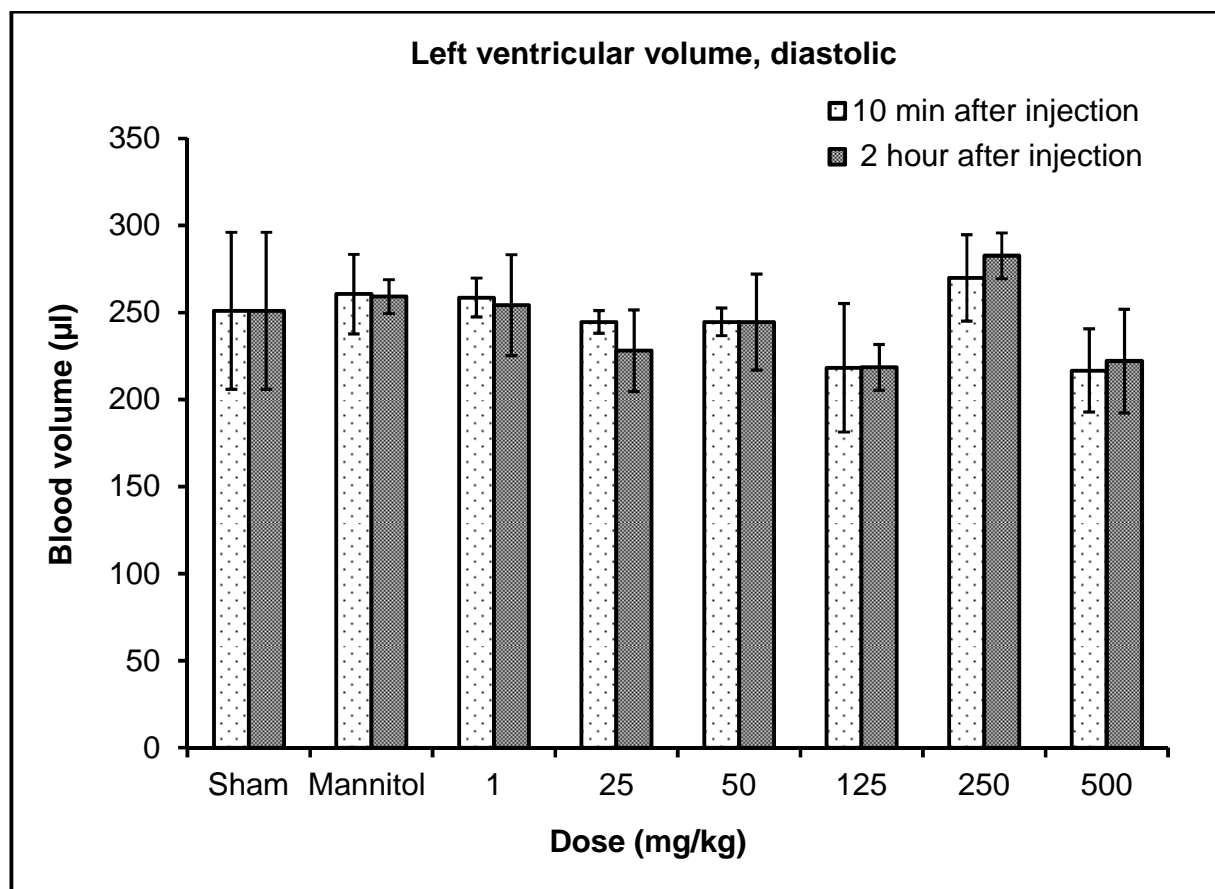

Figure S6 b

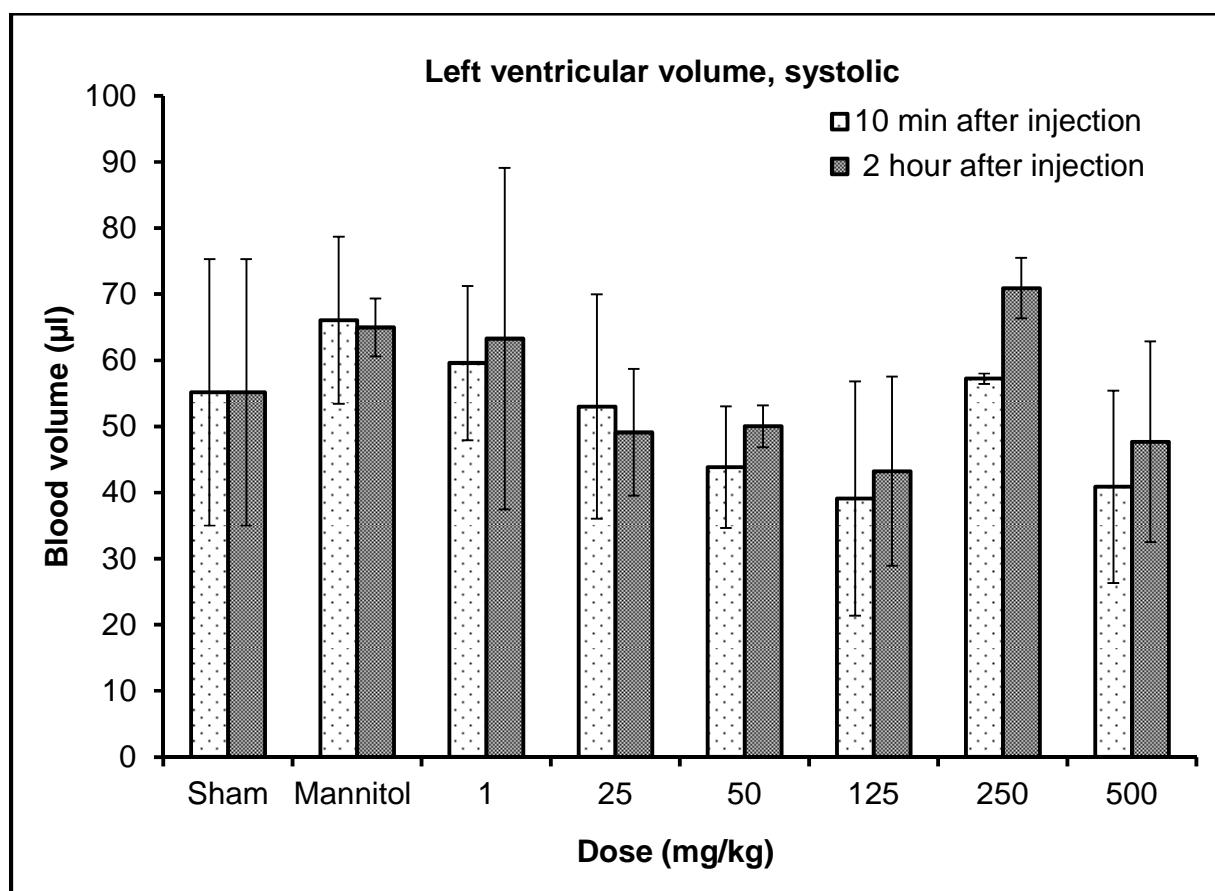

Figure S6 c

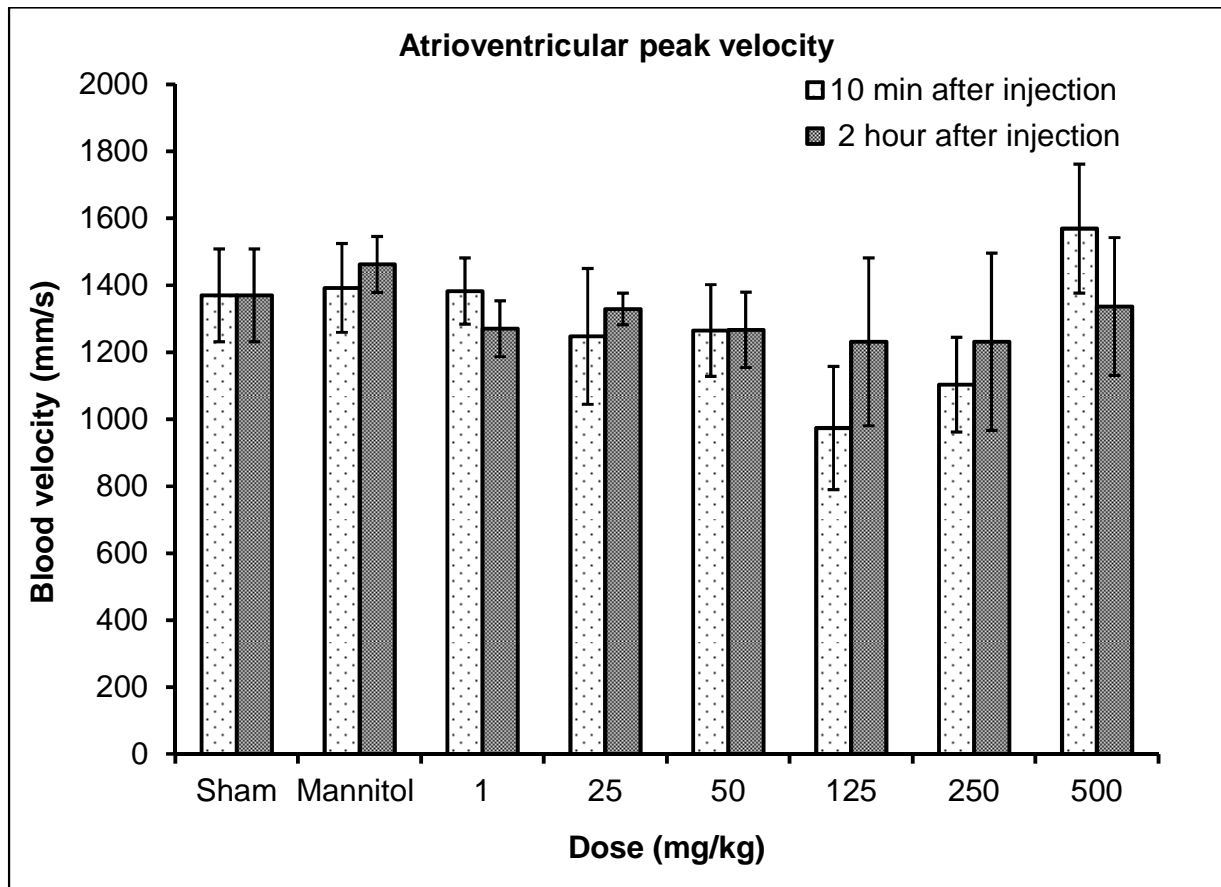

Figure S6 d

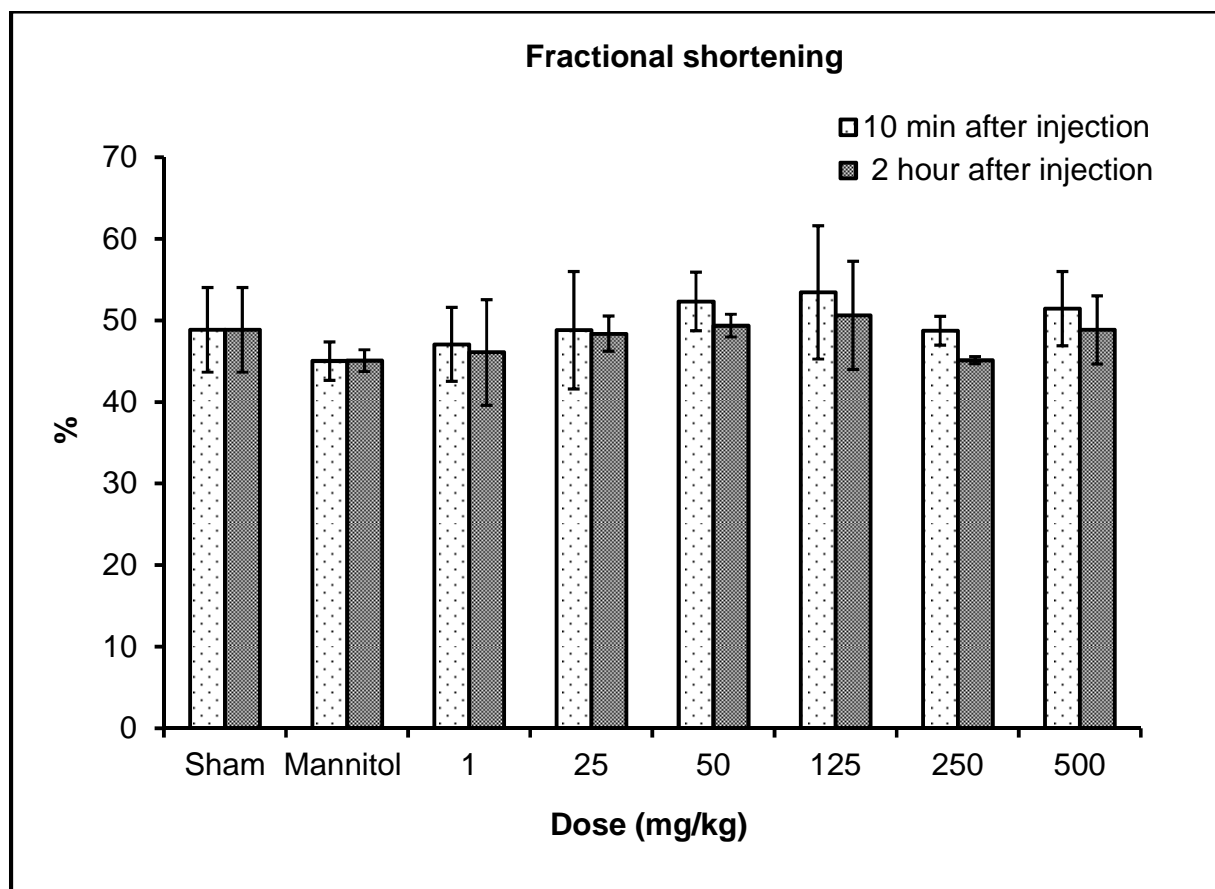

Figure S6 e

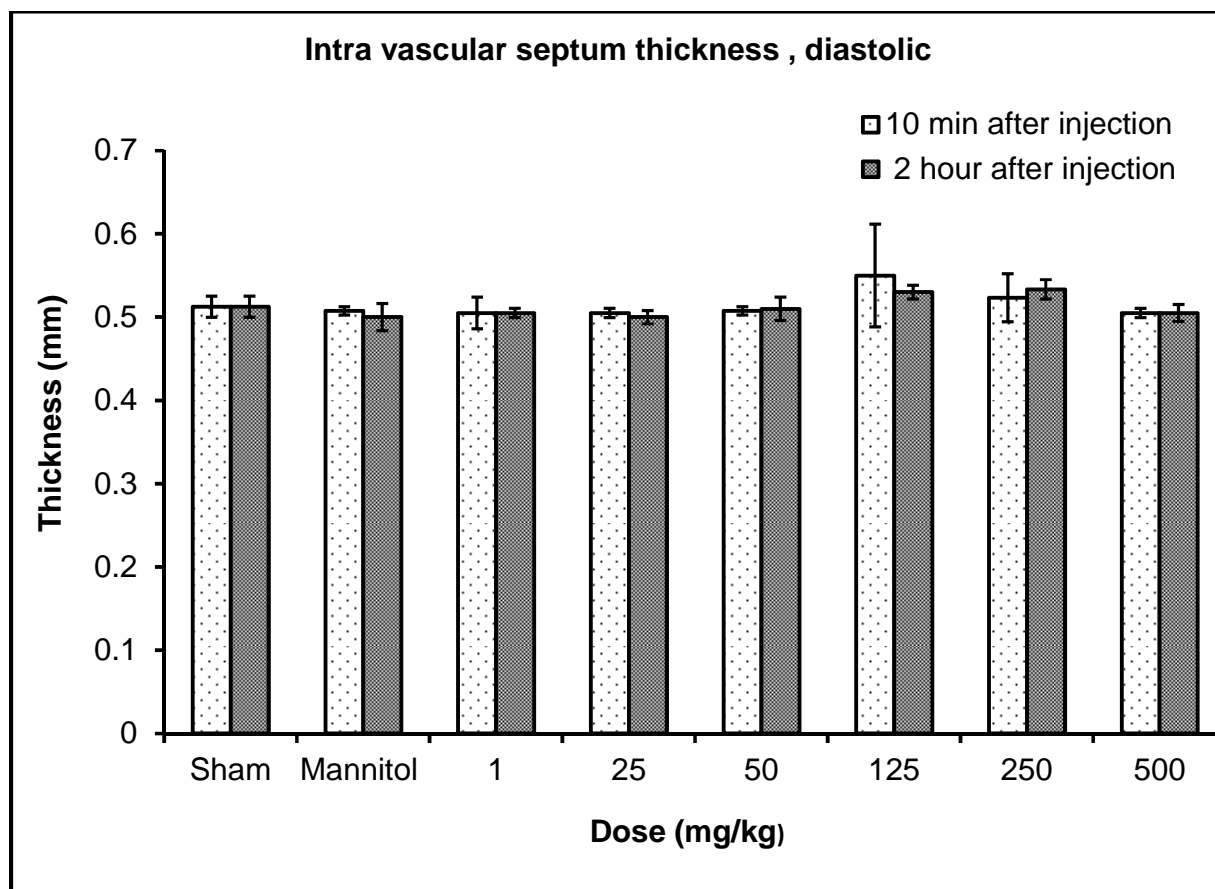

Figure S6 f

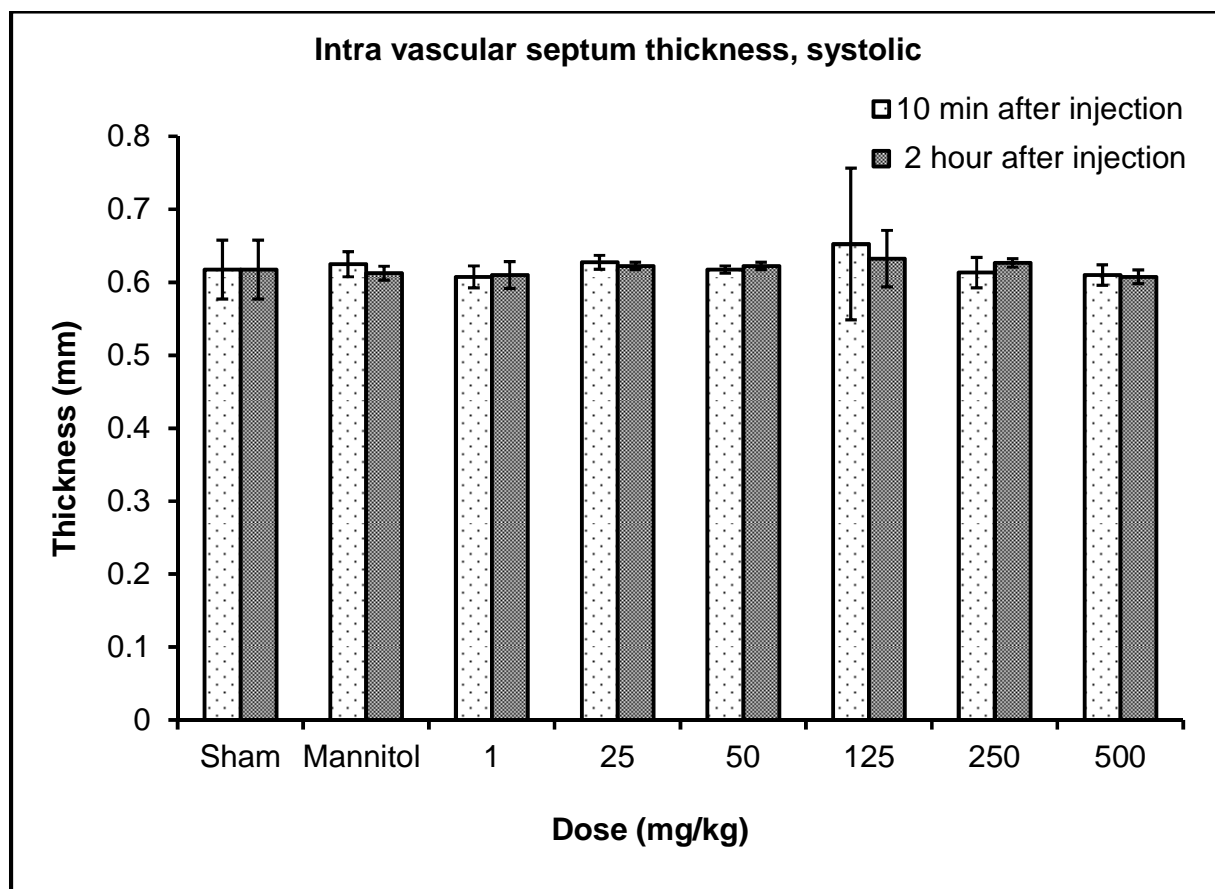

Figure S6 g

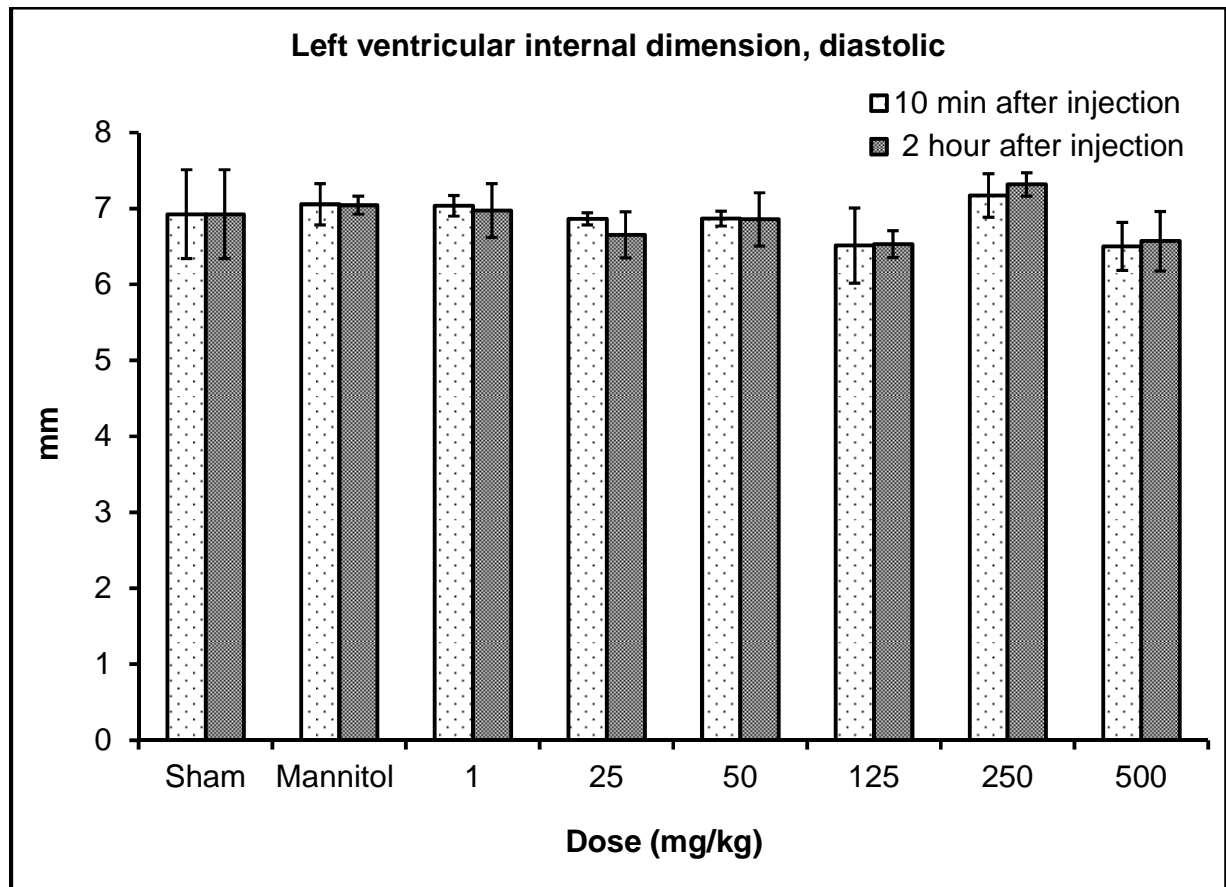



Figure S6 h

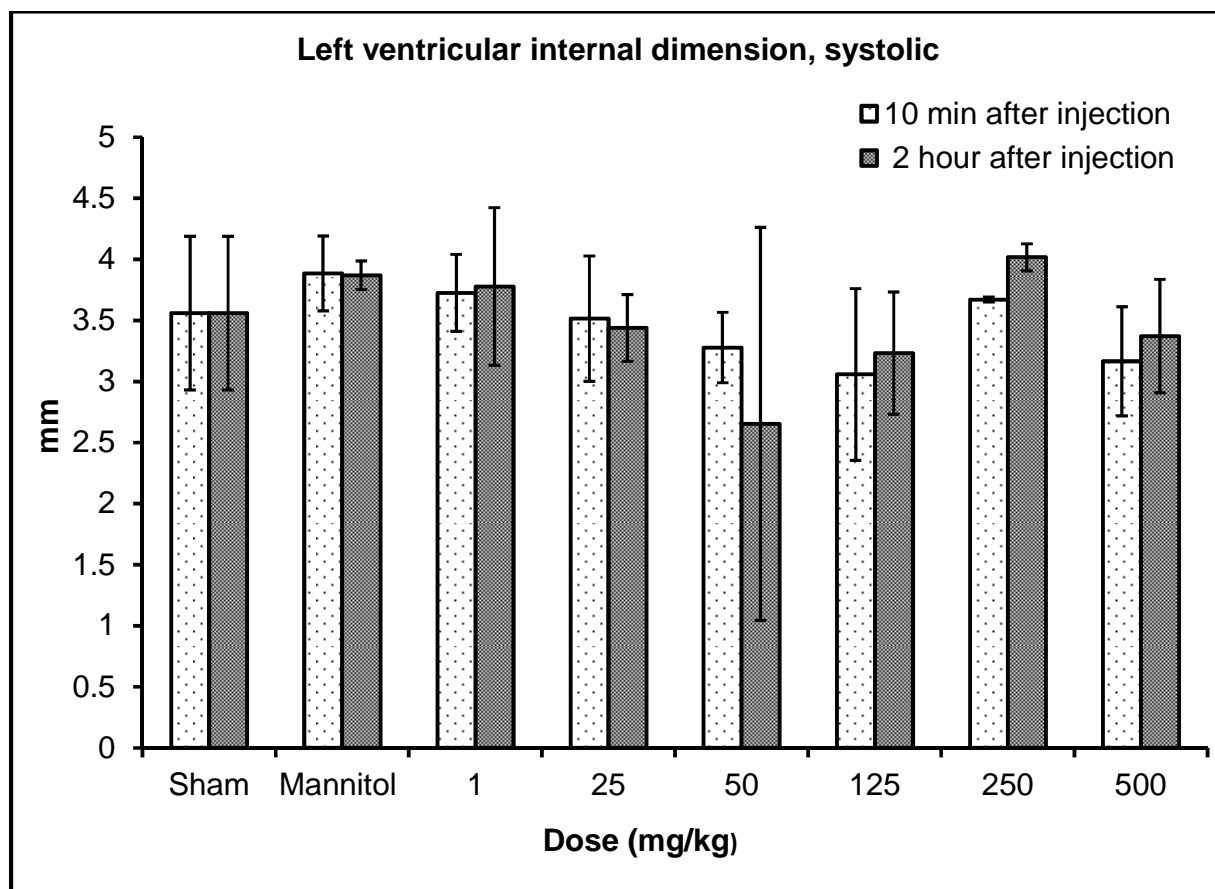

Figure S6 i

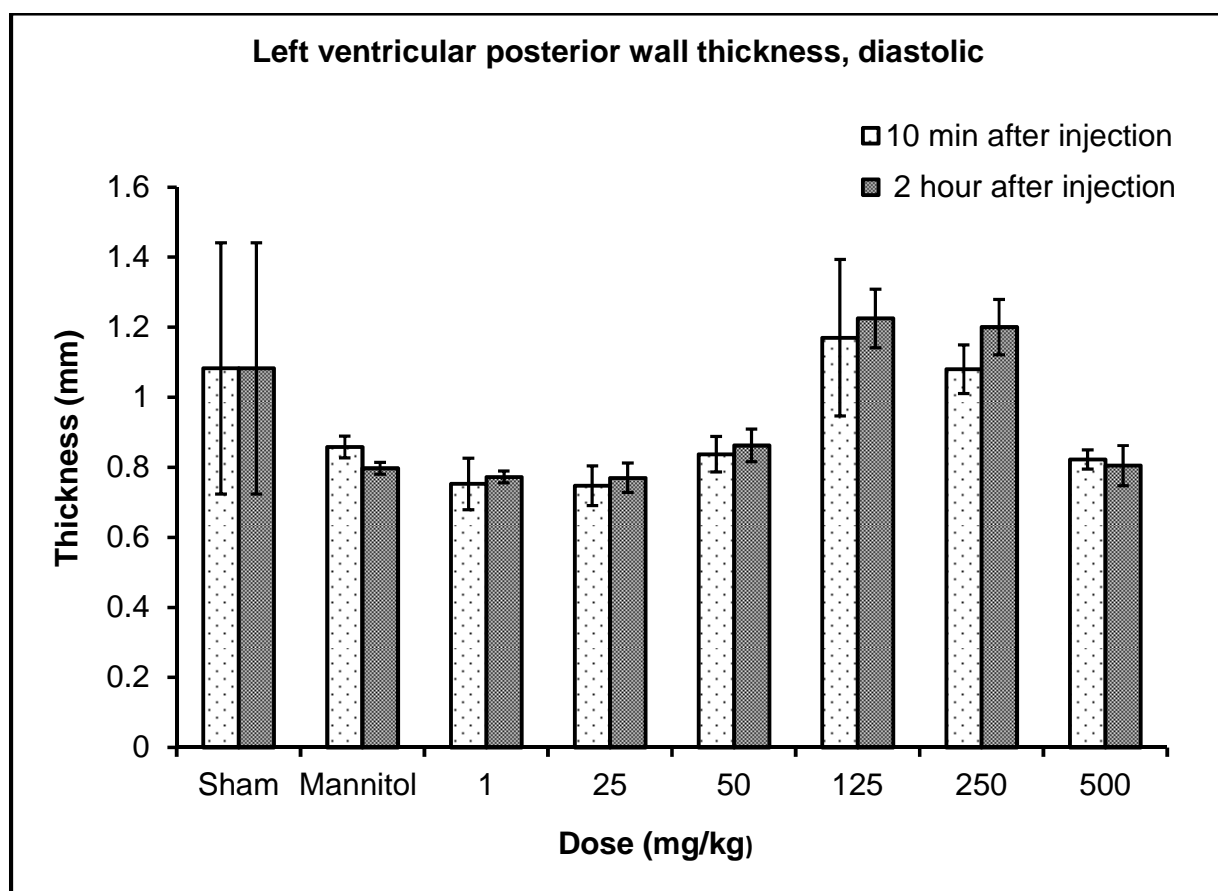

Figure S6 j

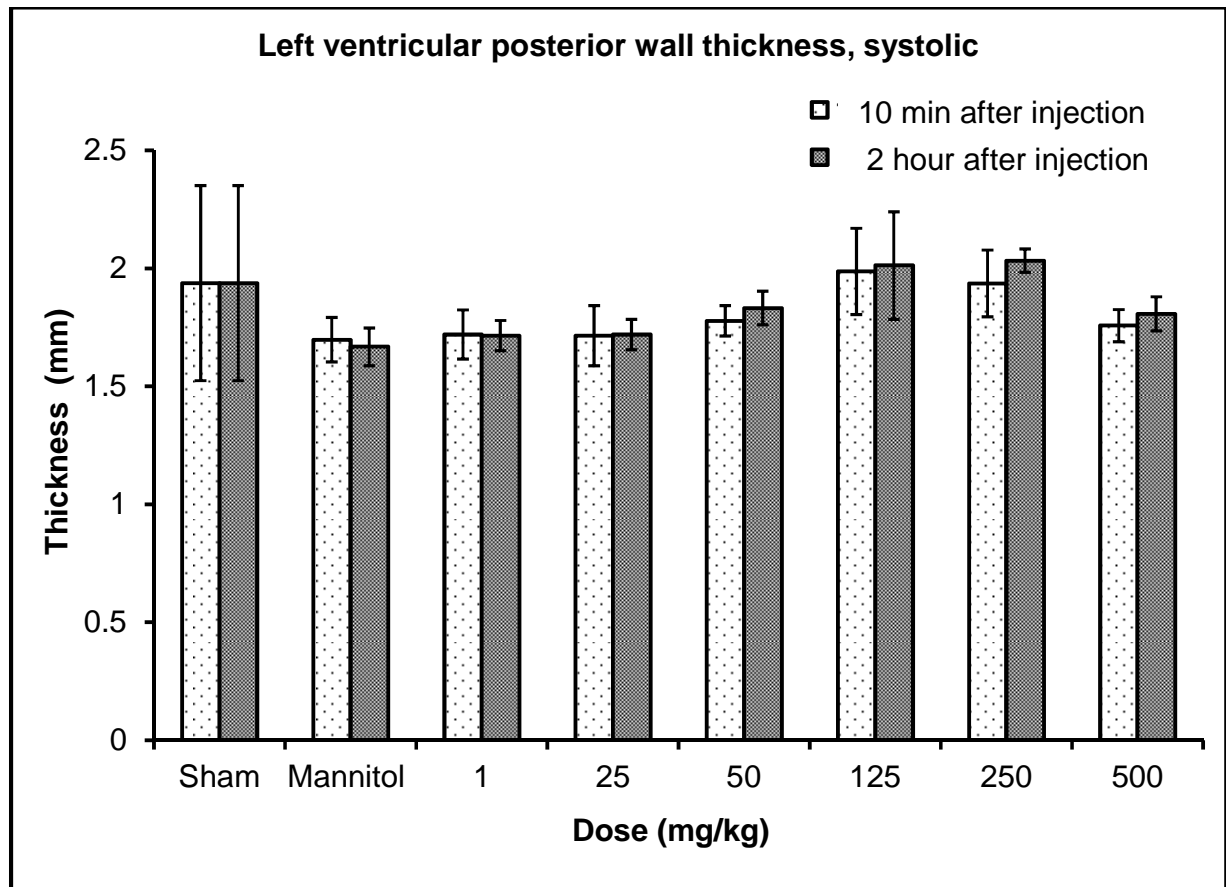

## Blood chemistry

Figure S7 a

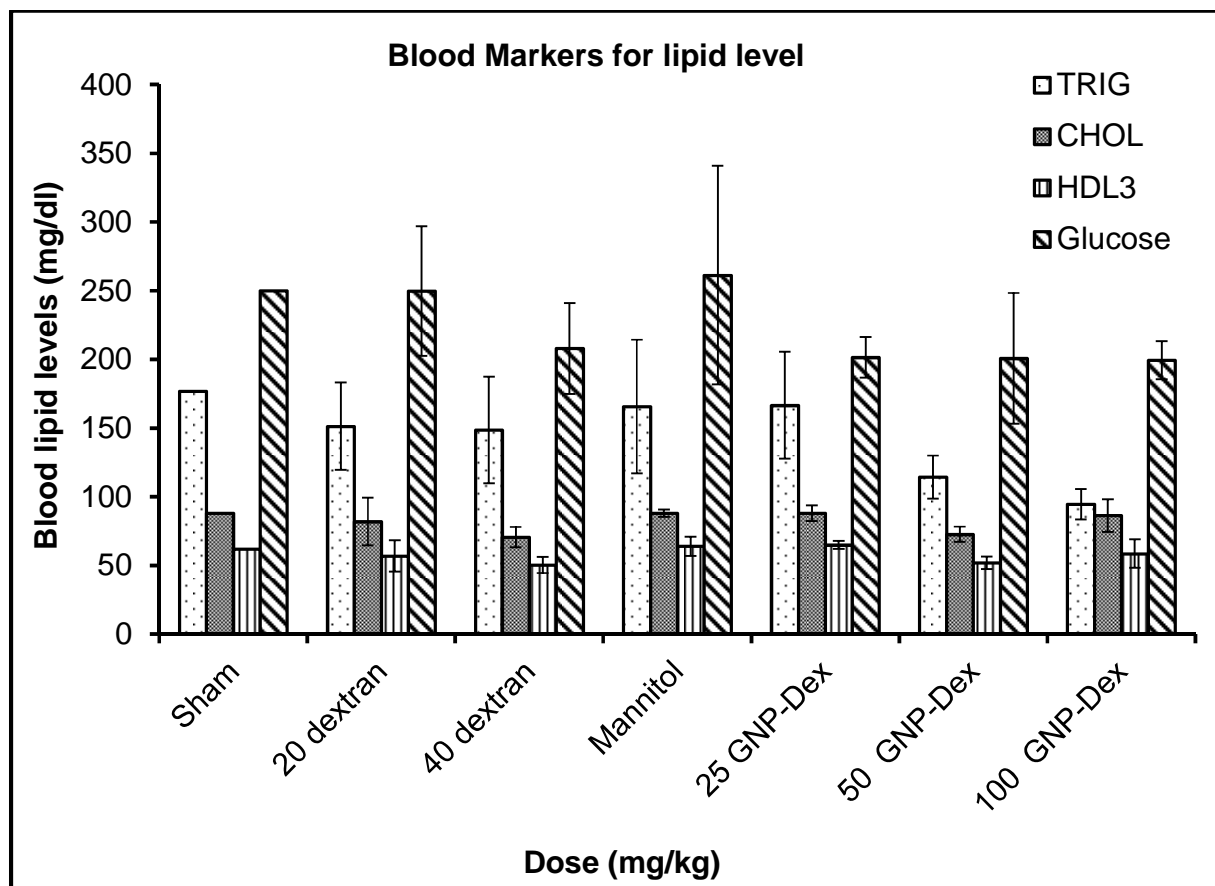

Figure S7 b

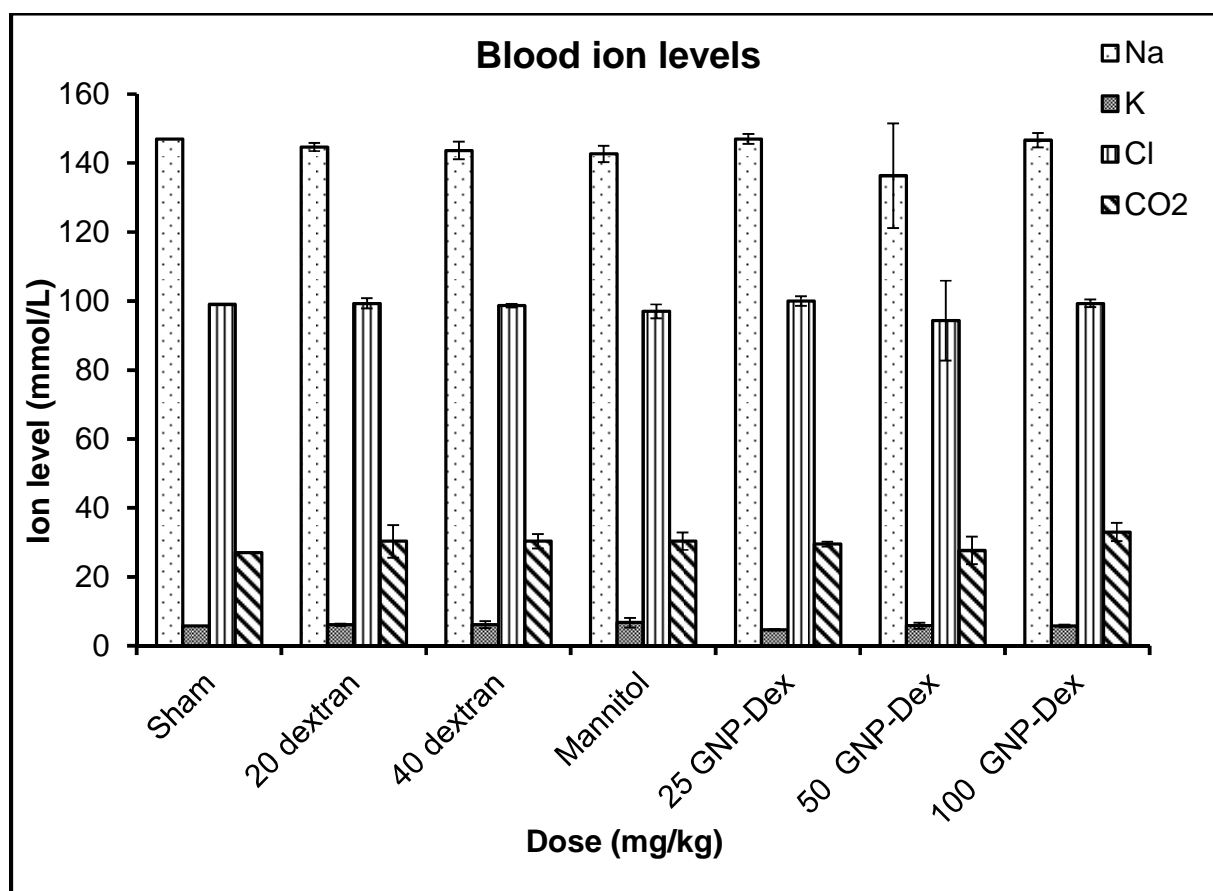

Figure S7 c

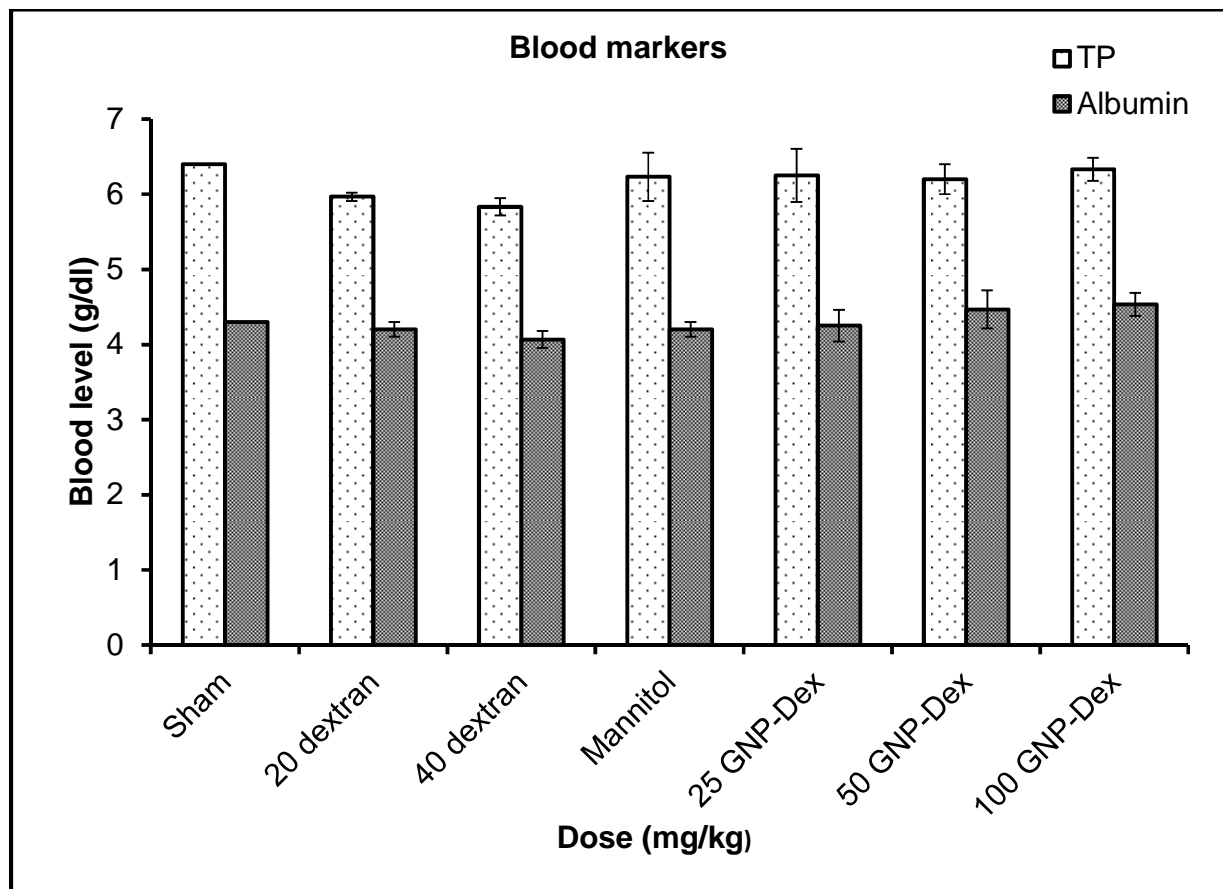

## References

- [1] Paratala BS, Jacobson BD, Kanakia S, Francis LD, Sitharaman B. Physicochemical characterization, and relaxometry studies of micro-graphite oxide, graphene nanoplatelets, and nanoribbons. *PloS one*. 2012;7:e38185.
- [2] Kanakia S TJ, Chowdhury SM, Lalwani G, Tembulkar T, Button T, Shroyer K, Moore W, Sitharaman B. Physicochemical characterization of a novel graphene based magnetic resonance imaging contrast agent. *Int J of Nanomed*. 2013;8:2821-33.
- [3] Chowdhury SM, Kanakia S, Toussaint JD, Frame MD, Dewar AM, Shroyer KR, et al. In vitro hematological and in vivo vasoactivity assessment of dextran functionalized graphene. *Sci Rep*. 2013;3.
- [4] Myocet product characteristic. [www.ema.europa.eu/docs/en\\_GB/document\\_library/EPAR\\_-\\_Product\\_Information/human/000297/WC500031811.pdf](http://www.ema.europa.eu/docs/en_GB/document_library/EPAR_-_Product_Information/human/000297/WC500031811.pdf).
- [5] Abraxane package insert. [www.abraxanecom/downloads/Abraxane\\_PrescribingInformation.pdf](http://www.abraxanecom/downloads/Abraxane_PrescribingInformation.pdf).
- [6] Guidelines for maximum adult dose limits of parenteral chemotherapy [www.medpathwaysinfo/medpathways/tools/content/1\\_F.pdf](http://www.medpathwaysinfo/medpathways/tools/content/1_F.pdf).
- [7] Ablavar package insert. <http://medlibrary.org/lib/rx/meds/ablavar-1>.
